# Supplementary material
Source: PubMed Central journal article supplement (PMC2633397)

## Supplementary Figure Legends

### Supplementary Figure 1. Su9-DHFR import into wild type and *tim10<sup>K68E</sup>* mitochondria.

<sup>35</sup>S-Su9-DHFR was imported into non heat-shocked (A) and heat-shocked (B) mitochondria isolated from wild-type and *tim10<sup>K68E</sup>* yeast strains in the presence and absence of a membrane potential ( $\Delta\psi$ ). Where indicated, samples were treated with trypsin (50  $\mu$ g/ml). All samples were analyzed using SDS-PAGE and phosphorimaging (p = precursor; m = mature).

### Supplementary Figure 2. Analysis of Tim9 and Tim10 truncation mutants.

(A) Proteins from whole cell extracts of haploid yeast strain YPH499, *Tim10<sup>WT</sup>* and *tim10<sup>AN12</sup>*, were separated on SDS-PAGE and subjected to western blotting. Tim10 levels in each strain were quantified relative to Mia40 (error bars represent S.D., n=3).

(B) Growth of *tim9 $\Delta$*  yeast strains expressing wild-type Tim9, Tim9<sup>AN10</sup>, Tim9<sup>AN15</sup> or lacking Tim9 plated on minimal glucose media supplemented with 5-FOA at 24°C.

(C) Growth of yeast strains expressing wild-type Tim9, Tim9<sup>AC10</sup>, Tim9<sup>AC13</sup>, Tim9<sup>AC14</sup> or lacking Tim9 plated on minimal glucose media supplemented with 5-FOA at 24°C.

(D) <sup>35</sup>S-Tim9<sup>AN15</sup>, <sup>35</sup>S-Tim9<sup>AC14</sup>, <sup>35</sup>S-Tim10<sup>AN21</sup> and <sup>35</sup>S-Tim10<sup>AC10</sup> were imported into wild type mitochondria. Following import, all samples were treated with trypsin (50  $\mu$ g/ml) before analysis by SDS-PAGE and phosphorimaging.

**Supplementary Figure 3. Analysis of steady state protein levels in mitochondria isolated from yeast strains.**

(A - C) Equal amounts of mitochondria isolated from yeast strains as labeled were analyzed using SDS-PAGE and immunodecoration with antibodies against mitochondrial marker proteins.

**Supplementary Figure 4. Mitochondrial protein import analysis.**

(A)  $^{35}\text{S}$ -AAC was imported at 24°C into mitochondria isolated from wild-type, *tim10<sup>ΔC10</sup>* and *tim10<sup>ΔN12</sup>* yeast strains for the time points indicated in the presence and absence of a membrane potential ( $\Delta\psi$ ). Mitochondria were solubilized and analyzed via BN-PAGE and phosphorimaging (AAC<sub>II</sub> - AAC dimer).

(B)  $^{35}\text{S}$ -Tom40 was imported at 24°C into mitochondria isolated from wild-type, *tim10<sup>ΔC10</sup>* and *tim10<sup>ΔN12</sup>* yeast strains for the time points indicated. Mitochondria were solubilized and analyzed via BN-PAGE and phosphorimaging (SAM intermediate – Tom40 intermediate associated with the SAM complex; Intermediate II – Tom40 integrated in the mitochondrial outer membrane).

(C and D)  $^{35}\text{S}$ -Su9-DHFR was imported into mitochondria isolated from wild-type, *Tim9<sup>ΔC13</sup>* and *Tim9<sup>ΔN10</sup>* yeast strains in the presence and absence of a membrane potential ( $\Delta\psi$ ), and subjected to SDS-PAGE and autoradiography (p - precursor; m - mature).

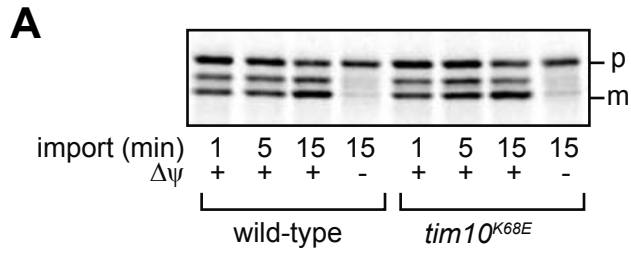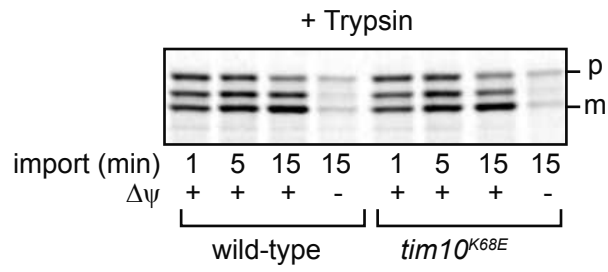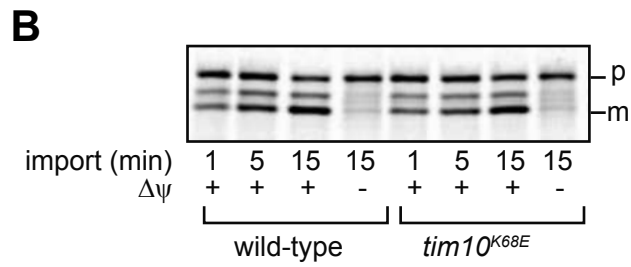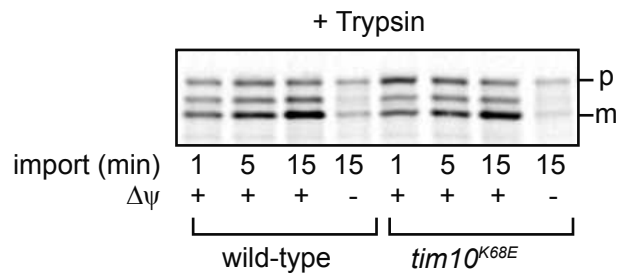

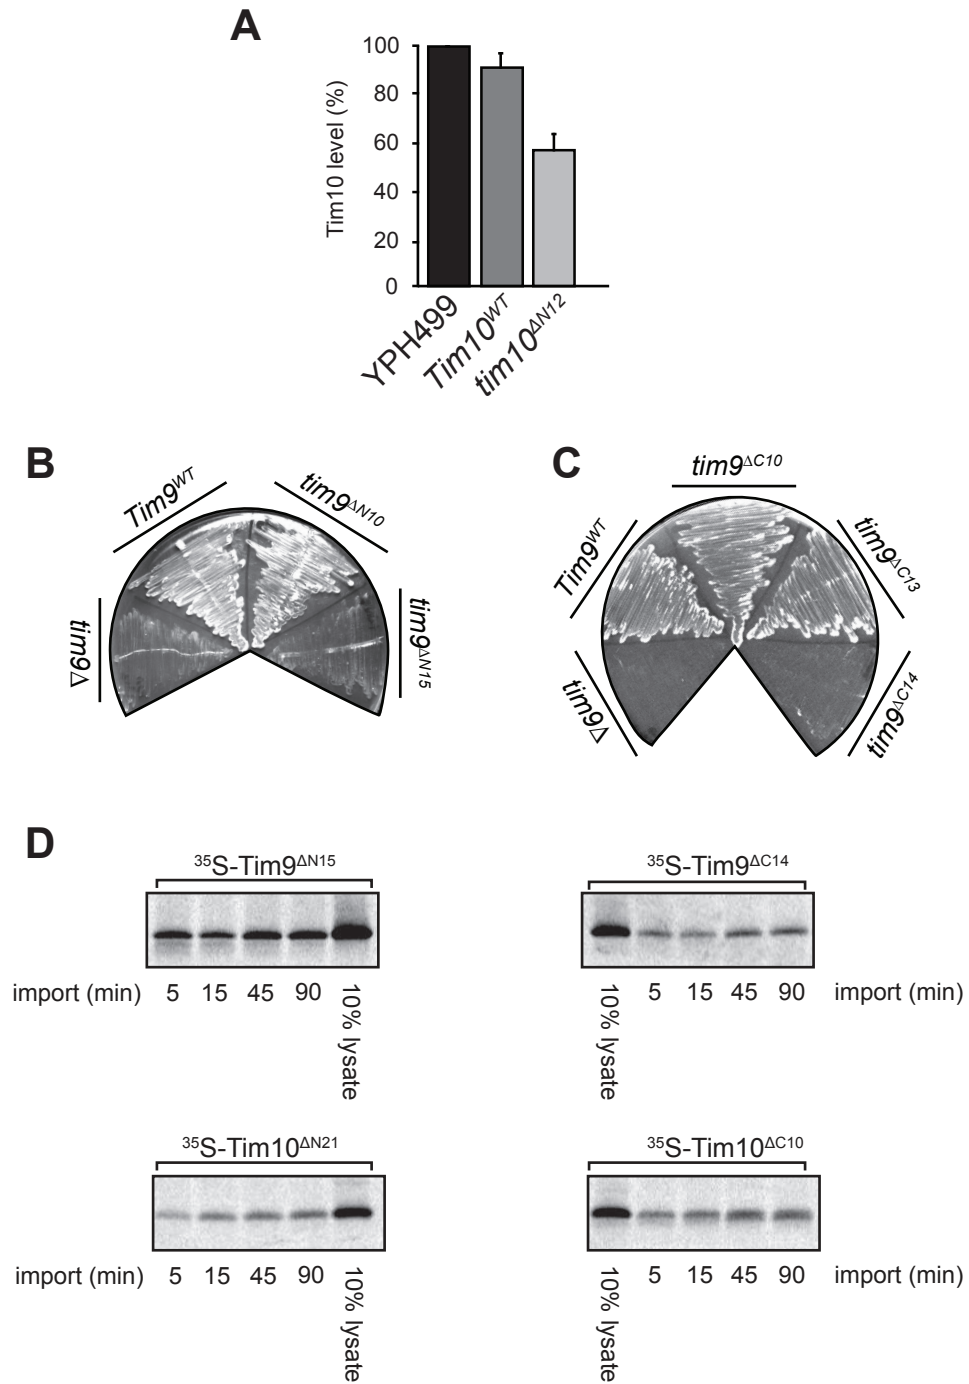

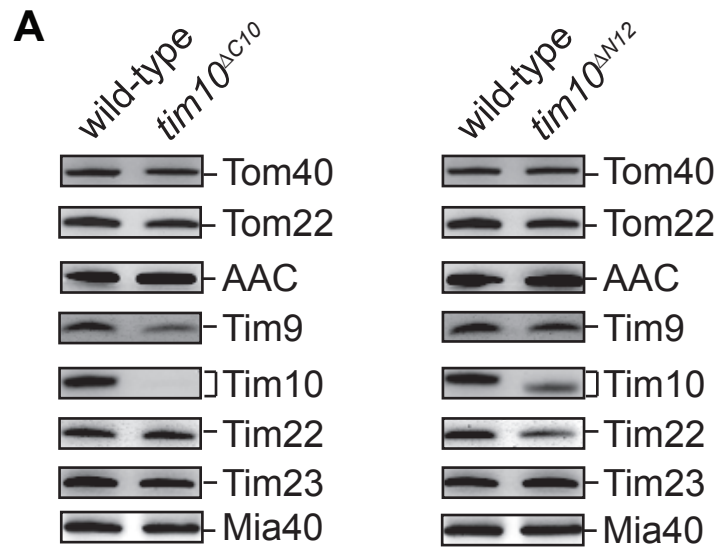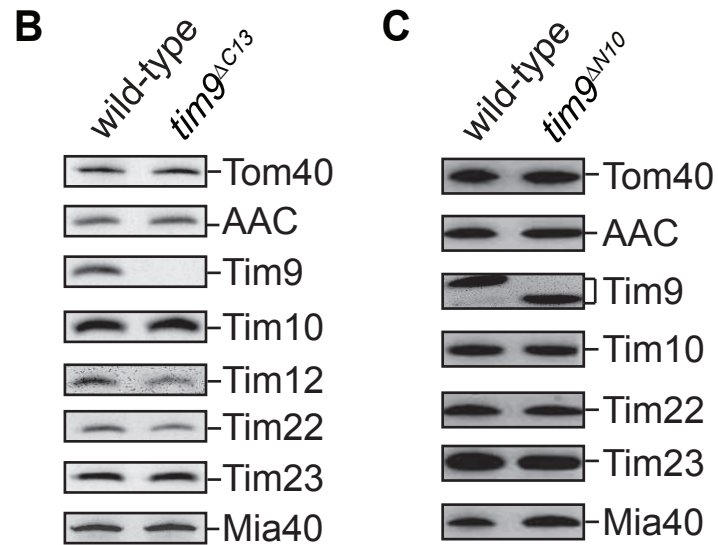

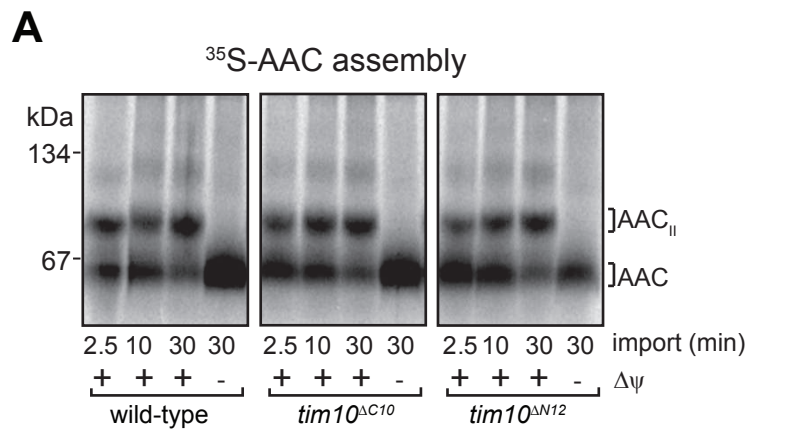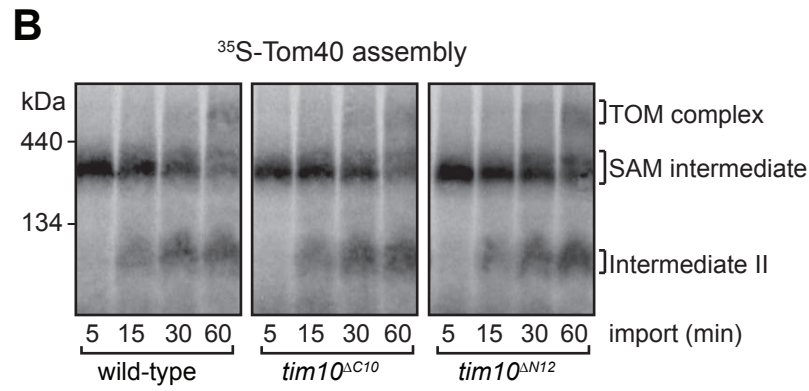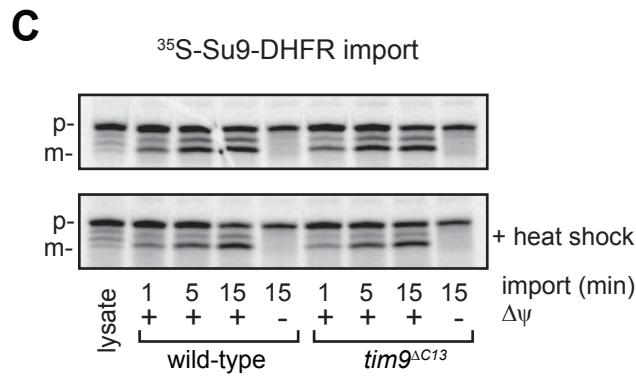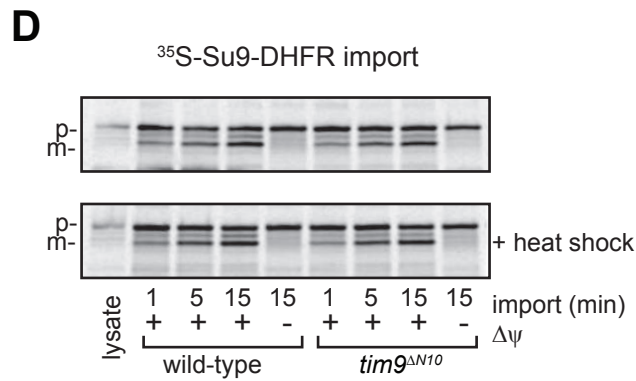

Supplement: E08-09-0903_1.pdf [file E08-09-0903_1.pdf]
